# Supplementary material
Source: publisher site journal article supplement (https://www.dovepress.com/article/198039)
Supplement: Supplementary file 1 [file get_supplementary_file.php]

Appendix 1

**MEDLINE electronic search strategy**

1. cancer.mp. or exp Neoplasms/

2. "cancer*".ab,kf,ti.

3. "neoplasm*".ab,kf,ti.

4. "carcino*".ab,kf,ti.

5. exp Carcinoma/

6. exp Sarcoma/

7. "sarcoma*".ab,kf,ti.

8. "malignan*".ab,kf,ti.

9. "tumour*".ab,kf,ti.

10. "tumor*".ab,kf,ti.

11. "metasta*".ab,kf,ti.

12. Neoplasm Metastasis/

13. 1 or 2 or 3 or 4 or 5 or 6 or 7 or 8 or 9 or 10 or 11 or 12

14. testicular.ab,kf,ti.

15. testis.ab,kf,ti.

16. testes.ab,kf,ti.

17. exp Testicular Diseases/ or exp Testicular Neoplasms/

18. exp Testis/

19. 14 or 15 or 16 or 17 or 18

20. "anx*".ab,kf,ti.

21. "depress*".ab,kf,ti.

22. "distress*".ab,kf,ti.

23. "stress*".ab,kf,ti.

24. "emotion*".ab,kf,ti.

25. mental health.ab,kf,ti.

26. post traumatic stress disorder.ab,kf,ti.

27. fear of recurrence.ab,kf,ti.

28. fear of cancer recurrence.ab,kf,ti.

29. exp Anxiety/ or exp Anxiety Disorders/

30. exp Depression/

31. exp Psychological Distress/

32. exp Stress, Psychological/

33. exp Emotions/

34. exp Mental Health/

35. exp Stress Disorders, Post-Traumatic/

36. 20 or 21 or 22 or 23 or 24 or 25 or 27 or 28 or 29 or 30 or 31 or 32 or 33 or 34 or 35

37. 13 and 19 and 36

Appendix 2

| **Article** |
| --- |
| 1. Cappuccio, F., Rossetti, S., Cavaliere, C., Iovane, G., Taibi, R., D’Aniello, C., Imbimbo, C., Facchini, S., Abate, V., Barberio, D. and Facchini, G., 2018. Health-related quality of life and psychosocial implications in testicular cancer survivors. A literature review. *Eur Rev Med Pharmacol Sci*, *22*(3), pp.645-61. |
| 1. Schepisi, G., De Padova, S., De Lisi, D., Casadei, C., Meggiolaro, E., Ruffilli, F., Rosti, G., Lolli, C., Ravaglia, G., Conteduca, V. and Farolfi, A., 2019. Psychosocial issues in long-term survivors of testicular Cancer. *Frontiers in endocrinology*, *10*, p.113. |
| 1. Heiniger, L.E., Smith, A.B., Olver, I., Grimison, P., Klein, B., Wootten, A., Abbott, J.A., Price, M.A., McJannett, M., Tran, B. and Stockler, M.R., 2017. e‐TC: Development and pilot testing of a web‐based intervention to reduce anxiety and depression in survivors of testicular cancer. European journal of cancer care, 26(6), p.e12698. |
| 1. Smith, A.B., Rutherford, C., Butow, P., Olver, I., Luckett, T., Grimison, P., Toner, G., Stockler, M. and King, M., 2018. A systematic review of quantitative observational studies investigating psychological distress in testicular cancer survivors. *Psycho‐oncology*, *27*(4), pp.1129-1137. |
| 1. Alexis, O., Adeleye, A. O., & Worsley, A. J. (2019). Men’s experiences of surviving testicular cancer: an integrated literature review. Journal of Cancer Survivorship. doi:10.1007/s11764-019-00841-2 |
| 1. Fung, C., Dinh, P. C., Jr., Fossa, S. D., & Travis, L. B. (2019). Testicular cancer survivorship. JNCCN Journal of the National Comprehensive Cancer Network, 17(12), 1557-1568. doi:10.6004/jnccn.2019.7369 |
| 1. Fossa, S.D., Dahl, A.A., Loge, J.H. (2003). Fatigue, anxiety, and depression in long-term survivors of testicular cancer. Journal of Clinical Oncology, 21 (7), pp. 1249-1254. <https://www.scopus.com/inward/record.uri?eid=2-s2.0-0037837666&doi=10.1200%2fJCO.2003.08.163&partnerID=40&md5=7cd70a62eb854981ddf4bee43a4e3435> |
| 1. Dahl, A.A., Haaland, C.F., Mykletun, A., Bremnes, R., Dahl, O., Klepp, O., Wist, E., Fosså, S.D. (2005). Study of anxiety disorder and depression in long-term survivors of testicular cancer. Journal of Clinical Oncology, 23 (10), pp. 2389-2395. <https://www.scopus.com/inward/record.uri?eid=2-s2.0-17144431417&doi=10.1200%2fJCO.2005.05.061&partnerID=40&md5=98b3e7a59e204552465bc42134bbbf38> |
| 1. Skaali, T., Fosså, S.D., Bremnes, R., Dahl, O., Haaland, C.F., Hauge, E.R., Klepp, O., Oldenburg, J., Wist, E., Dahl, A.A. (2009). Fear of recurrence in long-term testicular cancer survivors. Psycho-Oncology, 18 (6), pp. 580-588. <https://www.scopus.com/inward/record.uri?eid=2-s2.0-67949099056&doi=10.1002%2fpon.1437&partnerID=40&md5=c7f4c5a96c49340d94a0d1d3ae7ede8d> |
